# Supplementary material for: Impact of the choice of buffer on the electrochemical reduction of Cr(vi) in water on carbon electrodes
Source: Royal Society of Chemistry journal article supplement (doi:10.1039/d2ra05943f), 2022-01-01
Supplement: d2ra05943f1.pdf [file d2ra05943f1.pdf]

Supporting Information

## **Impact of the Choice of Buffer on the Electrochemical Reduction of Cr(VI) in Water on Carbon Electrodes**

*Callie M. Stern, Devin D. Meche, Noémie Elgrishi\**

Department of Chemistry, Louisiana State University,

Baton Rouge, Louisiana, 70803, United States

\*Correspondence to: [noemie@lsu.edu](mailto:noemie@lsu.edu)

| <i>Index</i>                                            |            | <i>Page</i> |
|---------------------------------------------------------|------------|-------------|
| <b>Variable Scan Rate Studies in Malate Buffer</b>      | Figure S1  | SI-3        |
| <b>Variable Scan Rate Studies in Succinate Buffer</b>   | Figure S2  | SI-3        |
| <b>Effect of pH</b>                                     |            |             |
| In Malate Buffer                                        | Figure S3  | SI-4        |
| In Succinate Buffer                                     | Figure S4  | SI-4        |
| <b>Effect of Buffer Strength</b>                        |            |             |
| Peak Current and Potential Analysis at 0.20 mM Cr(VI)   | Figure S5  | SI-5        |
| Peak Current and Potential Analysis at 7.00 mM Cr(VI)   | Figure S6  | SI-5        |
| <b>Effect of Electrolyte</b>                            |            |             |
| At 0.20 mM Cr(VI)                                       | Figure S7  | SI-6        |
| At 7.00 mM Cr(VI)                                       | Figure S8  | SI-6        |
| <b>Variable Scan Rate Studies</b>                       |            |             |
| In Citrate Buffer                                       | Figure S9  | SI-7        |
| In Acetate Buffer                                       | Figure S10 | SI-7        |
| In Propanoate Buffer                                    | Figure S11 | SI-8        |
| In Glycolate Buffer                                     | Figure S12 | SI-8        |
| Summary analysis at 0.20 mM Cr(VI)                      | Figure S13 | SI-9        |
| Summary analysis at 7.00 mM Cr(VI)                      | Figure S14 | SI-9        |
| <b>Chronoamperometry of 0.20 mM Cr(VI)</b>              |            |             |
| In Malate Buffer                                        | Figure S15 | SI-10       |
| In Succinate Buffer                                     | Figure S16 | SI-10       |
| <b>Chronoamperometry of 7.00 mM Cr(VI)</b>              |            |             |
| In Malate Buffer                                        | Figure S17 | SI-11       |
| In Succinate Buffer                                     | Figure S18 | SI-11       |
| <b>X-Ray Photoelectron Spectroscopy Data</b>            | Figure S19 | SI-12       |
| <b>Electrode Recyclability Data in Succinate Buffer</b> | Figure S20 | SI-13       |

### Variable Scan Rate Studies in Malate Buffer

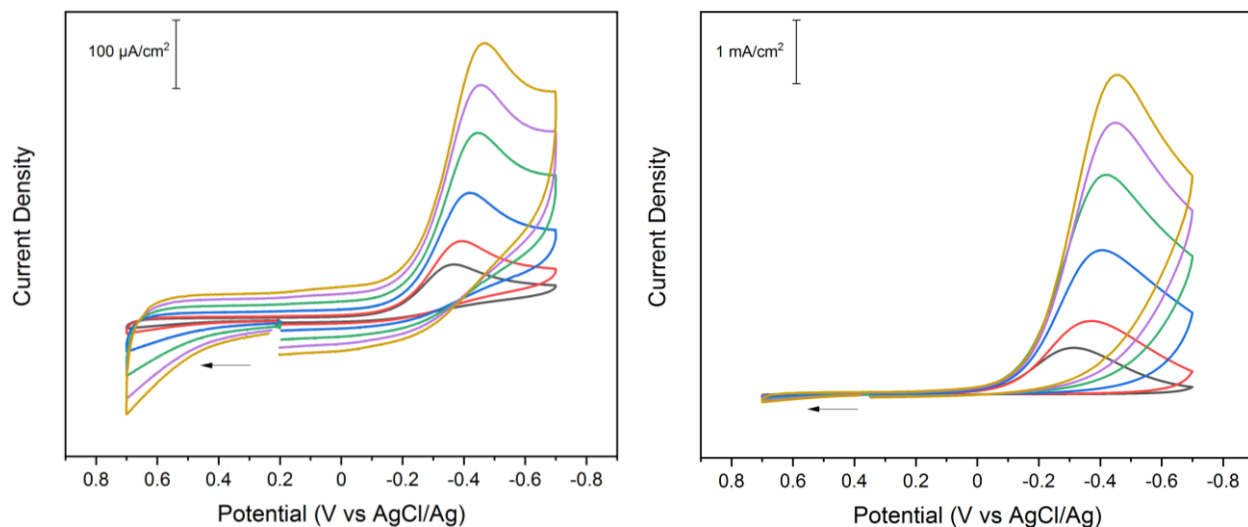

**Figure S1.** Cyclic voltammograms of 0.20 mM (left) and 7.00 mM (right) K<sub>2</sub>CrO<sub>4</sub> added to a 0.10 M malate buffer at pH 4.75. Data collected with 1.00 M KCl at scan rates of 0.05 (black), 0.10 (red), 0.25 (blue), 0.50 (green), 0.75 (purple) and 1.00 (yellow) V s<sup>-1</sup> on 3 mm diameter glassy carbon working electrodes.

### Variable Scan Rate Studies in Succinate Buffer

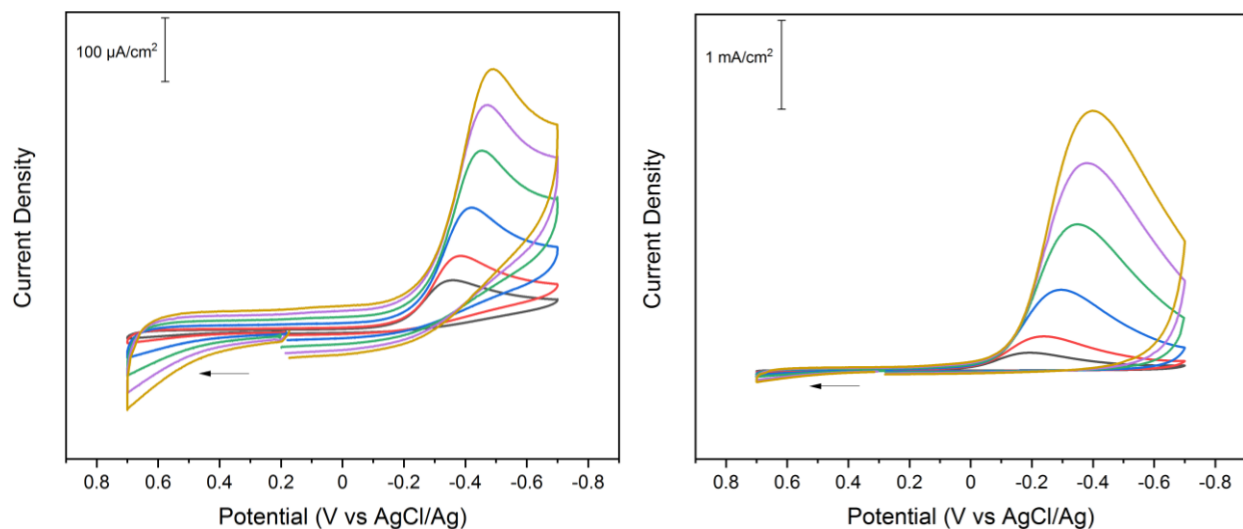

**Figure S2.** Cyclic voltammograms of 0.20 mM (left) and 7.00 mM (right) K<sub>2</sub>CrO<sub>4</sub> added to a 0.10 M succinate buffer at pH 4.75. Data collected with 1.00 M KCl at scan rates of 0.05 (black), 0.10 (red), 0.25 (blue), 0.50 (green), 0.75 (purple) and 1.00 (yellow) V s<sup>-1</sup> on 3 mm glassy carbon working electrodes.

## Effect of pH

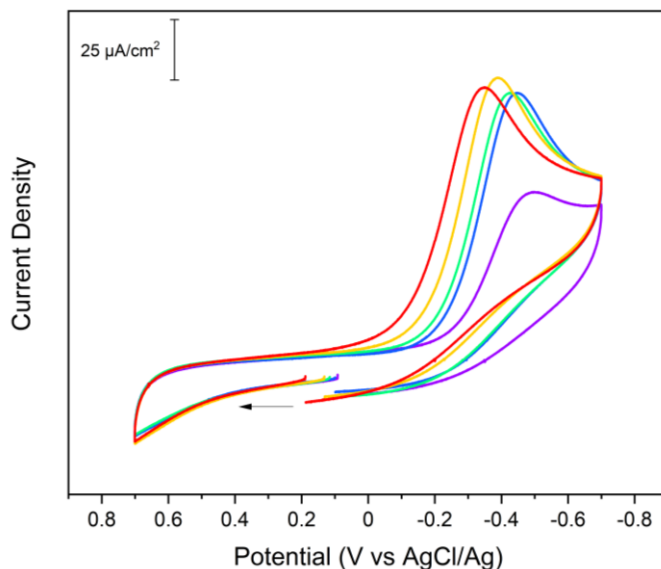

**Figure S3.** Cyclic voltammograms of 0.20 mM K<sub>2</sub>CrO<sub>4</sub> added to a 0.10 M malate buffer at pH values of 3.75 (red), 4.25 (orange), 4.75 (green), 5.25 (blue), and 5.75 (purple). Data collected with 1.00 M KCl at scan rates of 0.10 V s<sup>-1</sup> on 3 mm diameter glassy carbon working electrodes.

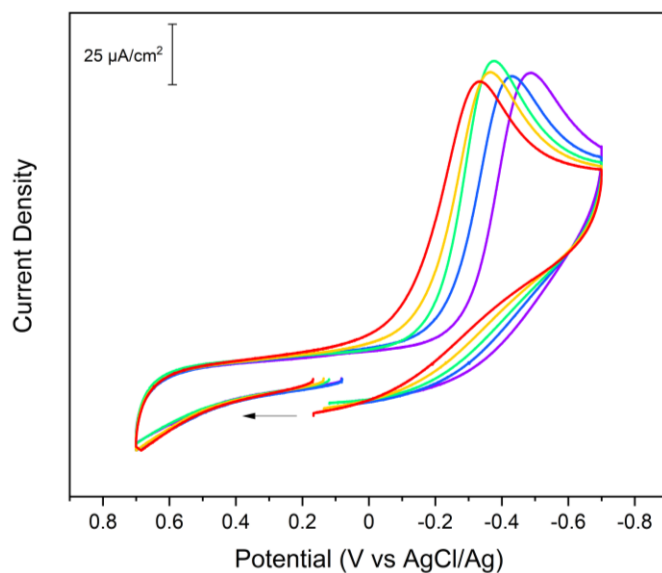

**Figure S4.** Cyclic voltammograms of 0.20 mM K<sub>2</sub>CrO<sub>4</sub> added to a 0.10 M succinate buffer at pH values of 3.75 (red), 4.25 (orange), 4.75 (green), 5.25 (blue), and 5.75 (purple). Data collected with 1.00 M KCl at scan rates of 0.10 V s<sup>-1</sup> on 3 mm diameter glassy carbon working electrodes.

## Effect of Buffer Strength

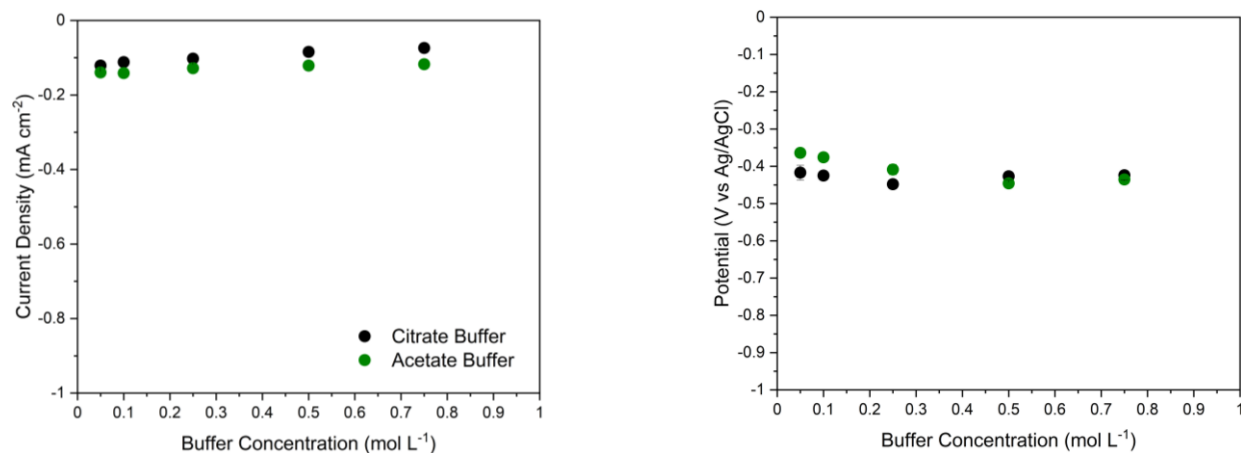

**Figure S5.** Reduction peak current density (left) and potential (right) values plotted as a function of buffer concentration for 0.20 mM K<sub>2</sub>CrO<sub>4</sub> added to a 0.10 M citrate (black) or acetate (green) buffer at pH 4.75. Data collected with 1.00 M KCl at scan rates of 0.10 V s<sup>-1</sup> on 3 mm diameter glassy carbon working electrodes.

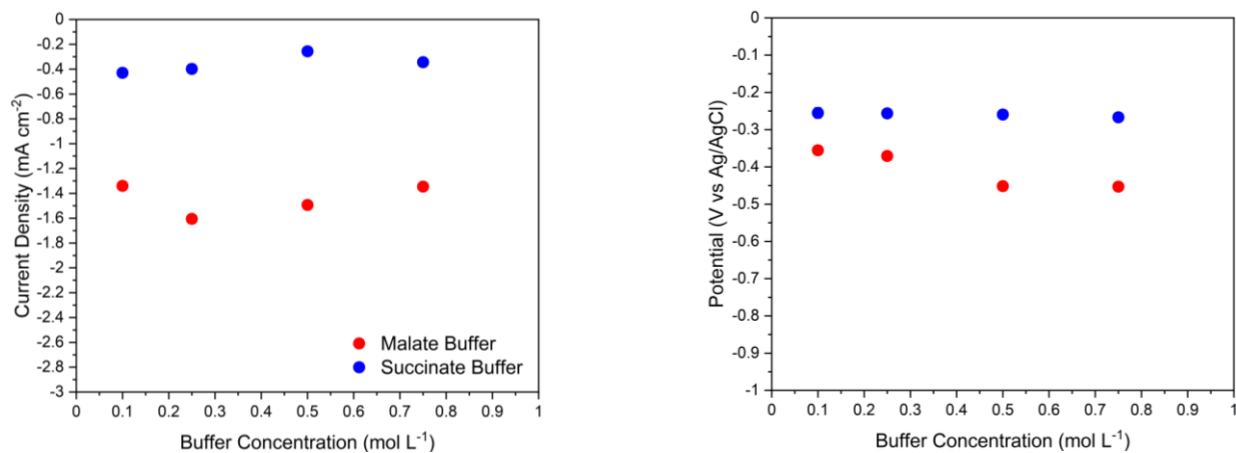

**Figure S6.** Reduction peak current density (left) and potential (right) values plotted as a function of buffer concentration for 7.00 mM K<sub>2</sub>CrO<sub>4</sub> added to a 0.10 M malate (red) or succinate (blue) buffer at pH 4.75. Data collected with 1.00 M KCl at scan rates of 0.10 V s<sup>-1</sup> on 3 mm diameter glassy carbon working electrodes.

## Effect of Electrolyte

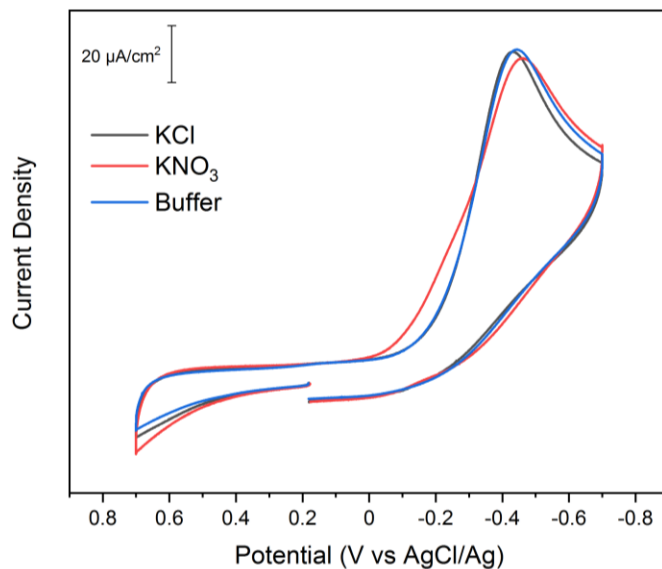

**Figure S7.** Cyclic voltammograms of 0.20 mM  $K_2CrO_4$  added to a 0.10 M citrate buffer at pH 4.75. Data collected with 1.00 M KCl (black), 1.00 M  $KNO_3$  (red), or without added electrolyte (blue) at scan rates of  $0.10 \text{ V s}^{-1}$  on 3 mm diameter glassy carbon working electrodes.

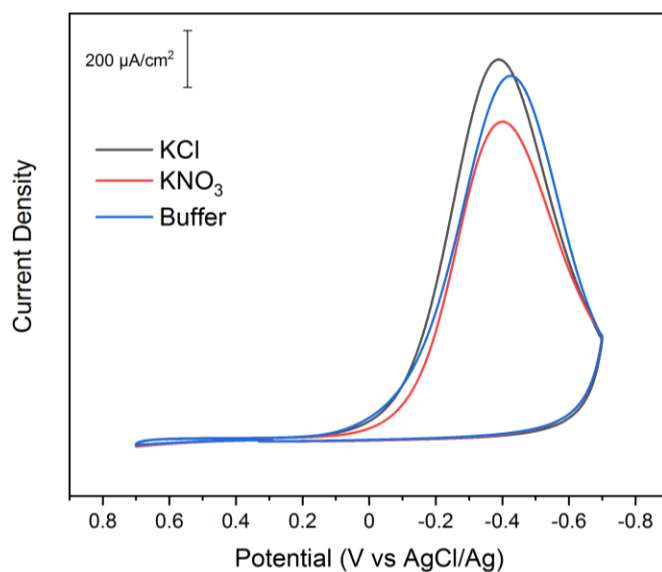

**Figure S8.** Cyclic voltammograms of 7.00 mM  $K_2CrO_4$  added to a 0.10 M citrate buffer at pH 4.75. Data collected with 1.00 M KCl (black), 1.00 M  $KNO_3$  (red), or without added electrolyte (blue) at scan rates of  $0.10 \text{ V s}^{-1}$  on 3 mm diameter glassy carbon working electrodes.

### Variable Scan Rate Studies in Citrate Buffer

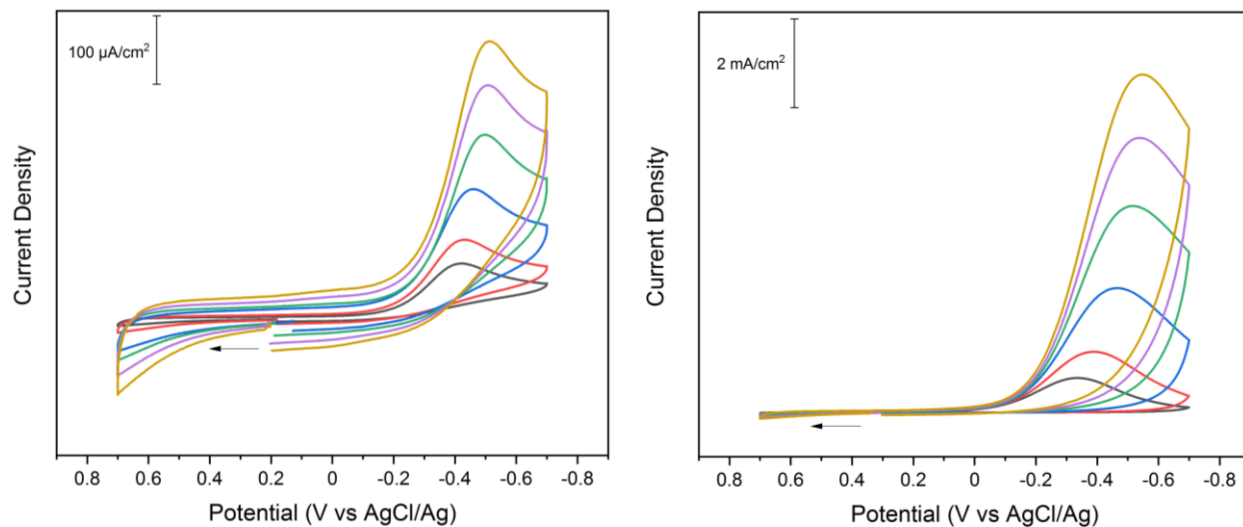

**Figure S9.** Cyclic voltammograms of 0.20 mM (left) and 7.00 mM (right) K<sub>2</sub>CrO<sub>4</sub> added to a 0.10 M citrate buffer at pH 4.75. Data collected with 1.00 M KCl at scan rates of 0.05 (black), 0.10 (red), 0.25 (blue), 0.50 (green), 0.75 (purple) and 1.00 (yellow) V s<sup>-1</sup> on 3 mm diameter glassy carbon working electrodes.

### Variable Scan Rate Studies in Acetate Buffer

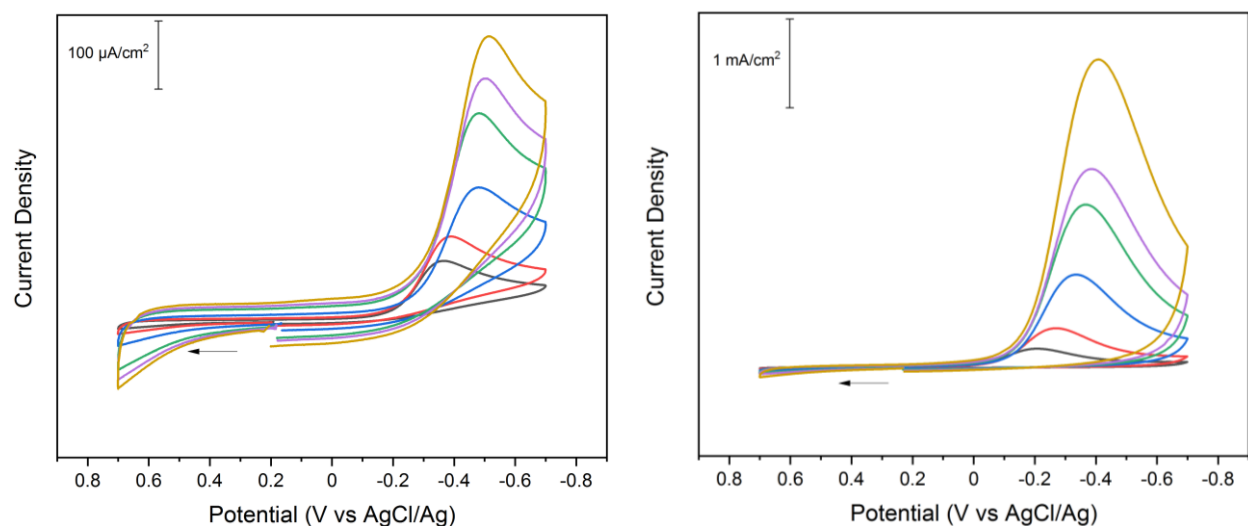

**Figure S10.** Cyclic voltammograms of 0.20 mM (left) and 7.00 mM (right) K<sub>2</sub>CrO<sub>4</sub> added to a 0.10 M acetate buffer at pH 4.75. Data collected with 1.00 M KCl at scan rates of 0.05 (black), 0.10 (red), 0.25 (blue), 0.50 (green), 0.75 (purple) and 1.00 (yellow) V s<sup>-1</sup> on 3 mm diameter glassy carbon working electrodes.

### Variable Scan Rate Studies in Propanoate Buffer

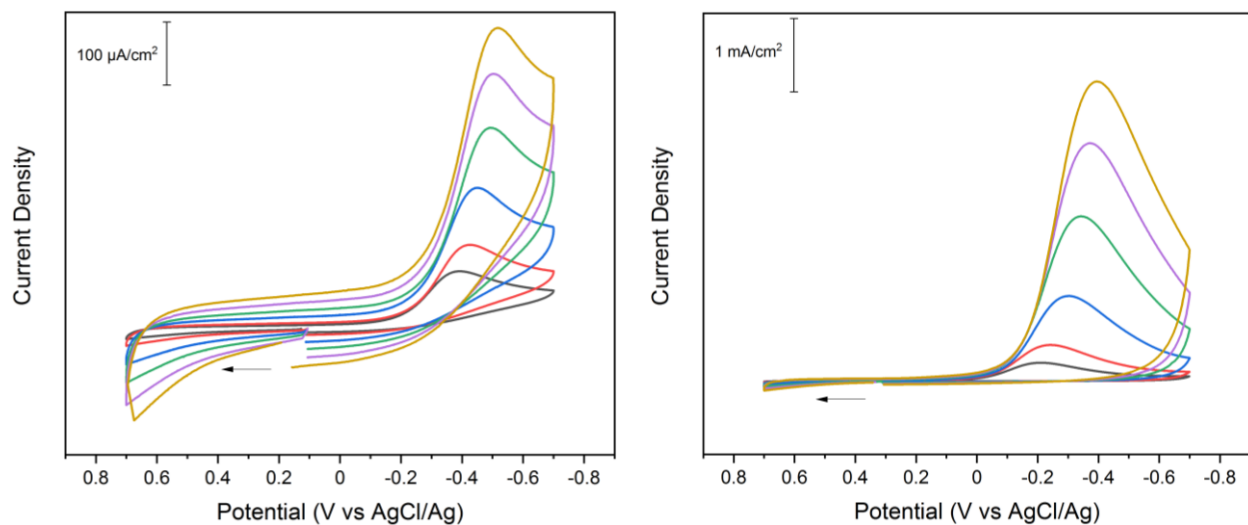

**Figure S11.** Cyclic voltammograms of 0.20 mM (left) and 7.00 mM (right) K<sub>2</sub>CrO<sub>4</sub> added to a 0.10 M propanoate buffer at pH 4.75. Data collected with 1.00 M KCl at scan rates of 0.05 (black), 0.10 (red), 0.25 (blue), 0.50 (green), 0.75 (purple) and 1.00 (yellow) V s<sup>-1</sup> on 3 mm diameter glassy carbon working electrodes.

### Variable Scan Rate Studies in Glycolate Buffer

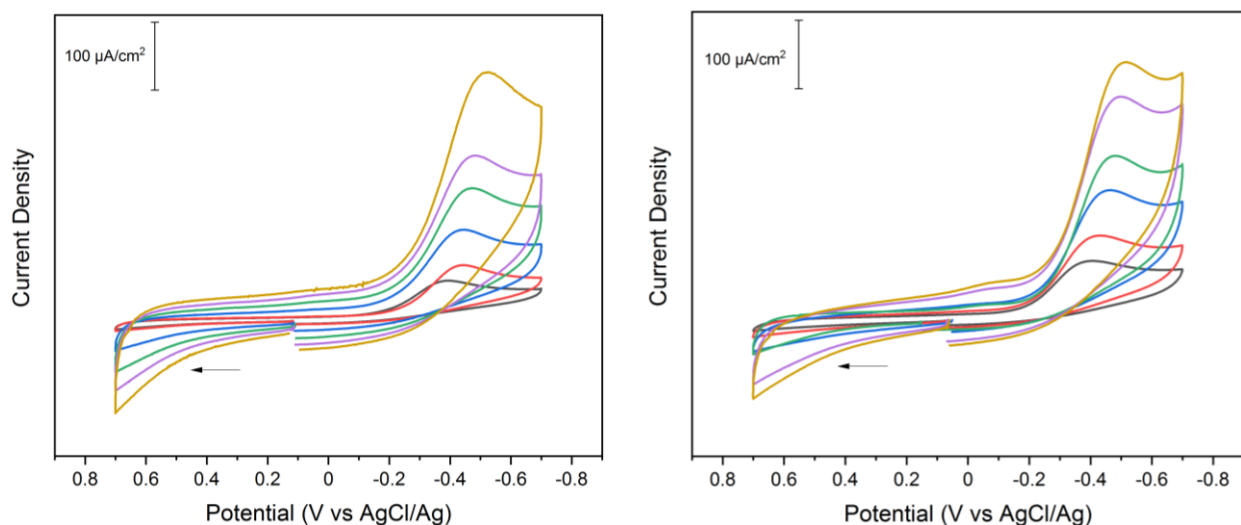

**Figure S12.** Cyclic voltammograms of 0.20 mM (left) and 7.00 mM (right) K<sub>2</sub>CrO<sub>4</sub> added to a 0.10 M glycolate buffer at pH 4.75. Data collected with 1.00 M KCl at scan rates of 0.05 (black), 0.10 (red), 0.25 (blue), 0.50 (green), 0.75 (purple) and 1.00 (yellow) V s<sup>-1</sup> on 3 mm diameter glassy carbon working electrodes.



### Summary Analysis of Variable Scan Rate Data At 0.20 mM Cr(VI)

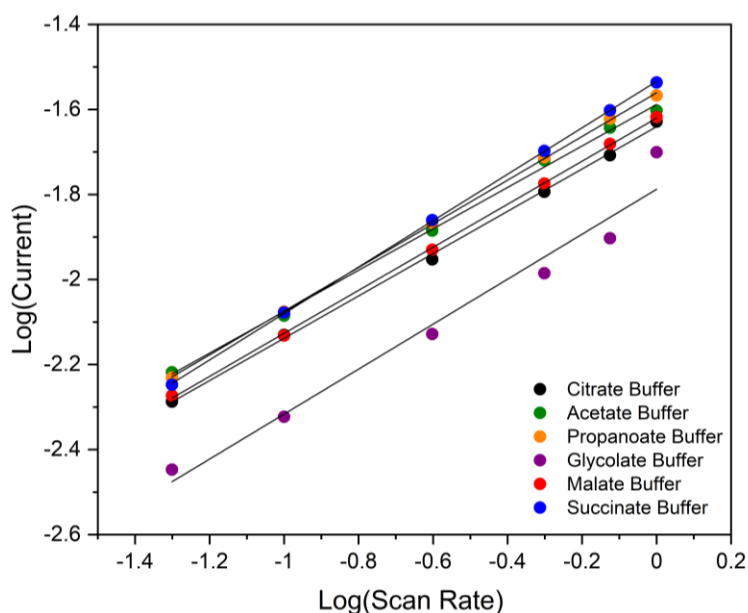

**Figure S13.** Log of the absolute values of the reduction peak currents (mA) plotted as a function of the log of the scan rate ( $V s^{-1}$ ) for the reduction of 0.20 mM  $K_2CrO_4$  added to 0.10 M acid buffers at pH 4.75. Malate and succinate data reproduced from figure 2 of the main text. Linear fit parameters given in Table 1. Data collected on 3 mm diameter glassy carbon working electrodes.

### Summary Analysis of Variable Scan Rate Data At 7.00 mM Cr(VI)

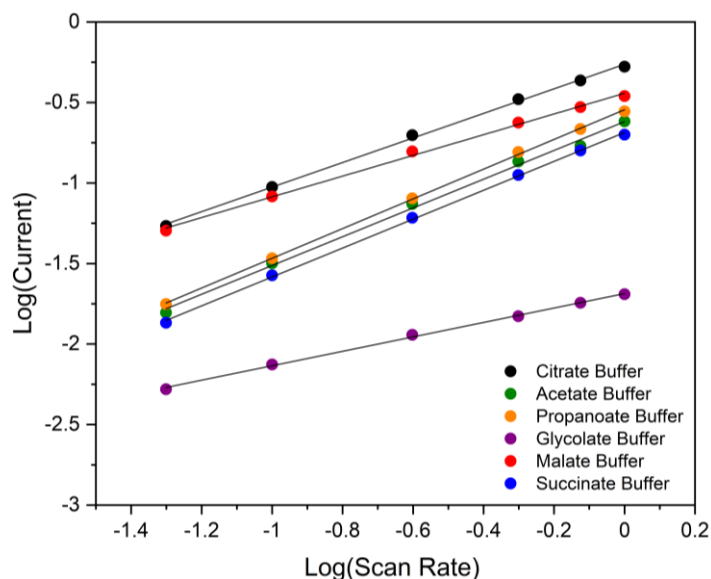

**Figure S14.** Log of the absolute values of the reduction peak currents (mA) plotted as a function of the log of the scan rate ( $V s^{-1}$ ) for the reduction of 7.00 mM  $K_2CrO_4$  added to 0.10 M acid buffers at pH 4.75. Malate and succinate data reproduced from figure 2 of the main text. Linear fit parameters given in Table 1. Data collected on 3 mm diameter glassy carbon working electrodes.

### Chronoamperometry of 0.20 mM Cr(VI) in Malate Buffer

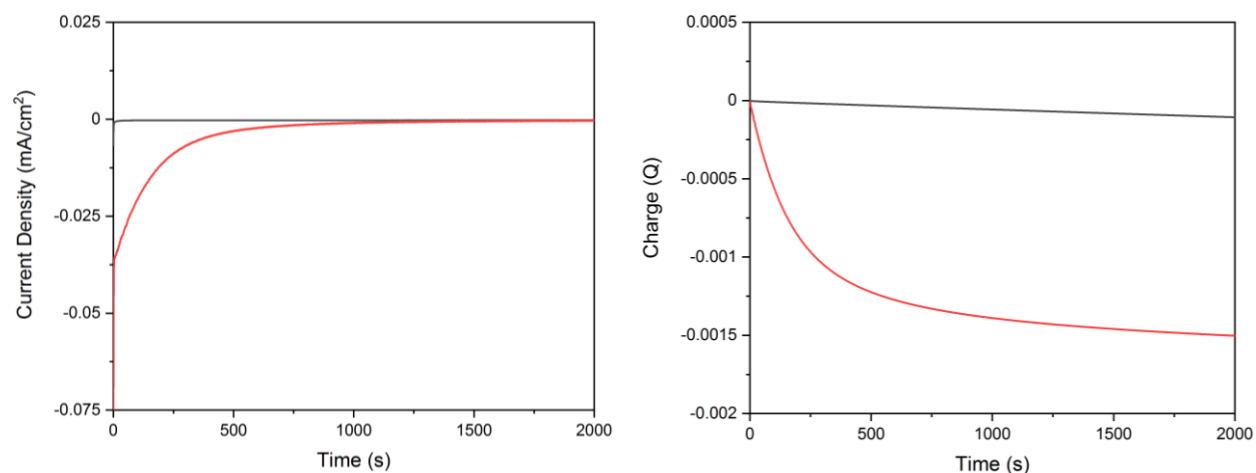

**Figure S15.** Current density (left) and corresponding charge passed (right) during the reduction at  $-0.300$  V vs AgCl/Ag of  $0.20$  mM  $K_2CrO_4$  added to a  $0.10$  M malate buffer at pH  $4.75$ . Data collected with  $1.00$  M KCl while stirring on a  $5$  mm diameter glassy carbon working electrode. The black trace is the background in the buffer without the Cr(VI) and collected at the same potential.

### Chronoamperometry of 0.20 mM Cr(VI) in Succinate Buffer

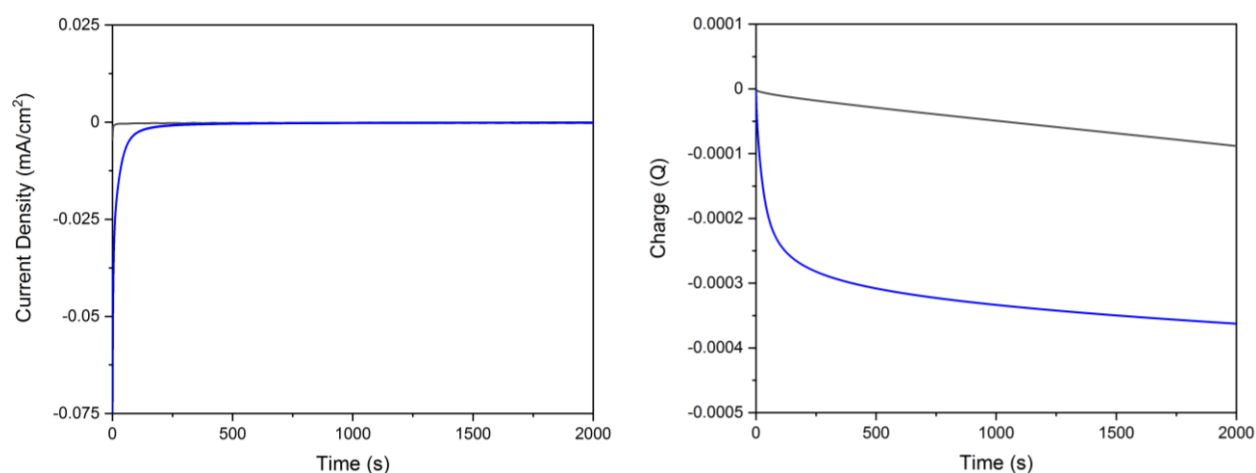

**Figure S16.** Current density (left) and corresponding charge passed (right) during the reduction at  $-0.300$  V vs AgCl/Ag of  $0.20$  mM  $K_2CrO_4$  added to a  $0.10$  M succinate buffer at pH  $4.75$ . Data collected with  $1.00$  M KCl while stirring on a  $5$  mm diameter glassy carbon working electrode. The black trace is the background in the buffer without the Cr(VI) and collected at the same potential.

### Chronoamperometry of 7.00 mM Cr(VI) in Malate Buffer

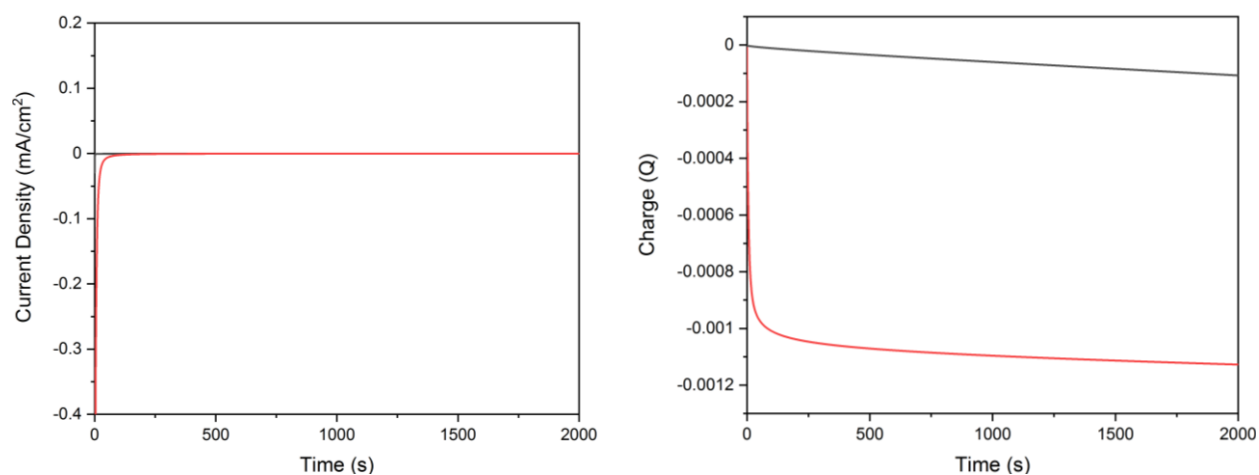

**Figure S17.** Current density (left) and corresponding charge passed (right) during the reduction at  $-0.200$  V vs AgCl/Ag of  $7.00$  mM  $K_2CrO_4$  added to a  $0.10$  M malate buffer at pH  $4.75$ . Data collected with  $1.00$  M KCl while stirring on a  $5$  mm diameter glassy carbon working electrode. The black trace is the background in the buffer without the Cr(VI) and collected at the same potential.

### Chronoamperometry of 7.00 mM Cr(VI) in Succinate Buffer

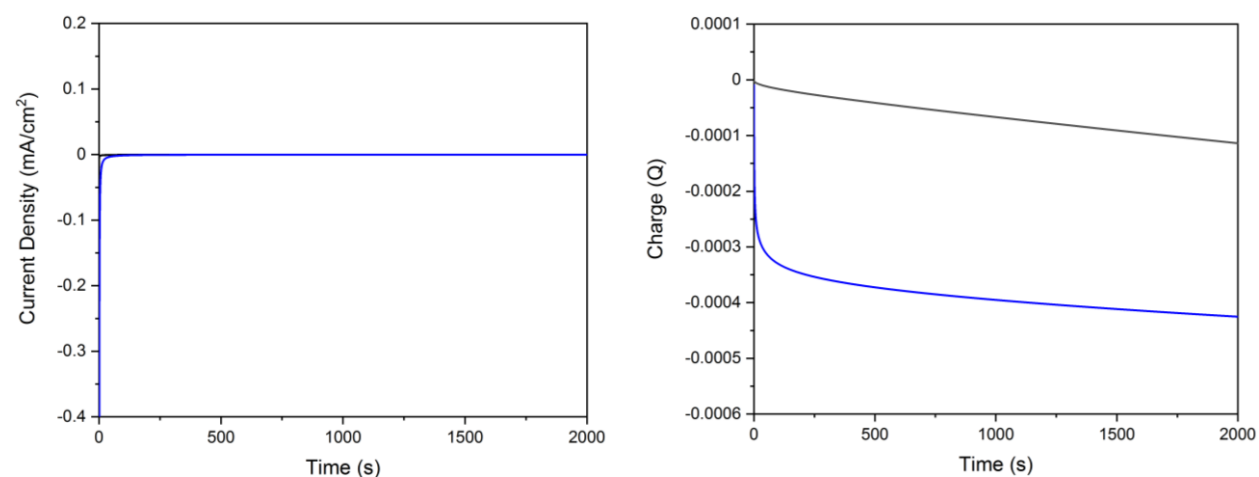

**Figure S18.** Current density (left) and corresponding charge passed (right) during the reduction at  $-0.200$  V vs AgCl/Ag of  $7.00$  mM  $K_2CrO_4$  added to a  $0.10$  M succinate buffer at pH  $4.75$ . Data collected with  $1.00$  M KCl while stirring on a  $5$  mm diameter glassy carbon working electrode. The black trace is the background in the buffer without the Cr(VI) and collected at the same potential.

## X-Ray Photoelectron Spectroscopy Data

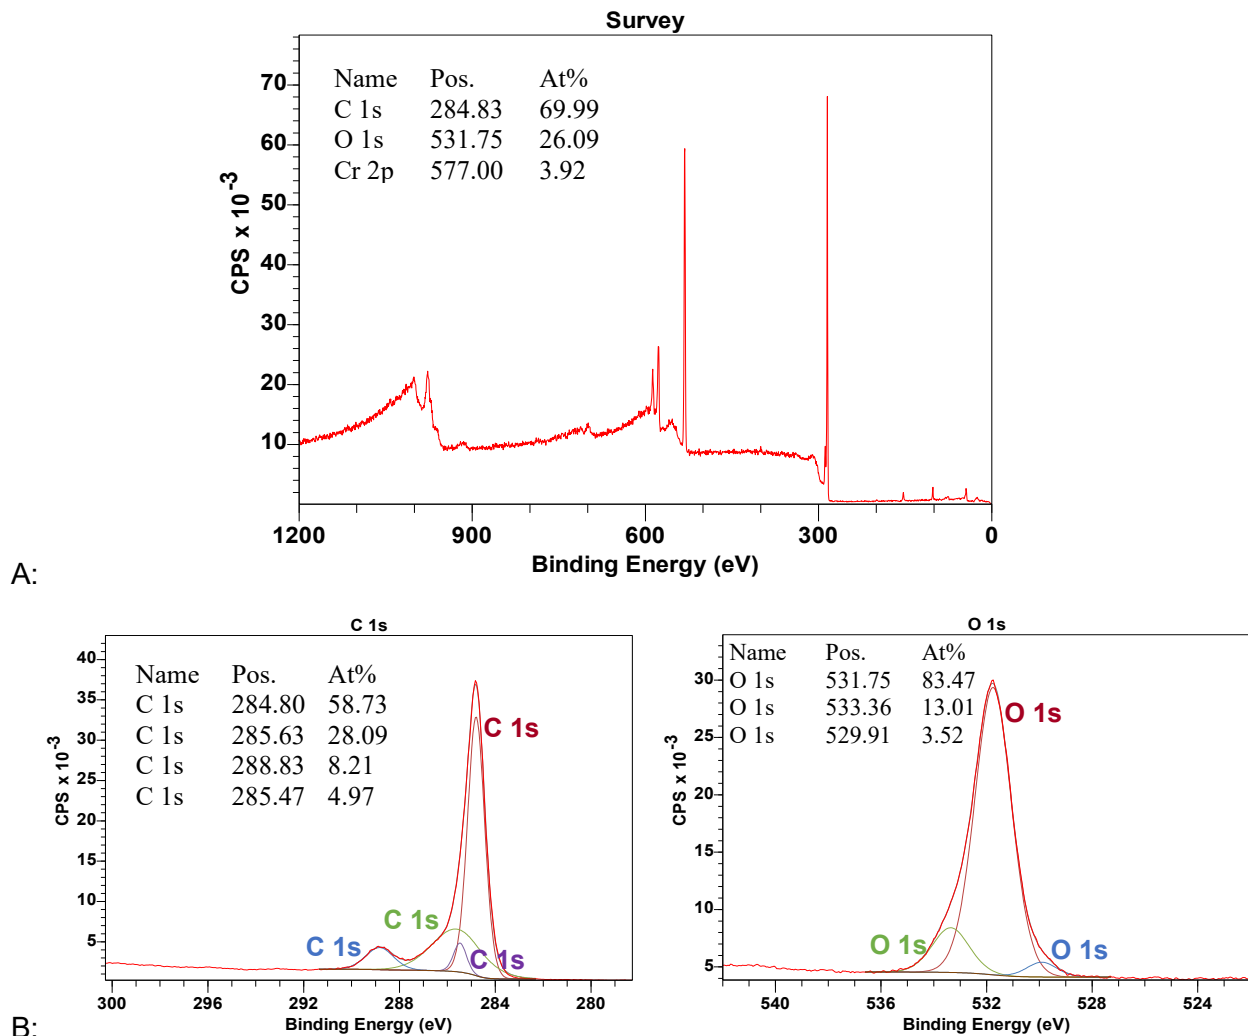

**Figure S19.** A: XPS wide region survey scan. Data was calibrated to C 1s at 284.8 eV. B: High resolution core scan of C 1s (left) and O 1s (right). High resolution core scan of Cr 2p signals are shown in Figure 5.

## Electrode Recyclability Data in Succinate Buffer

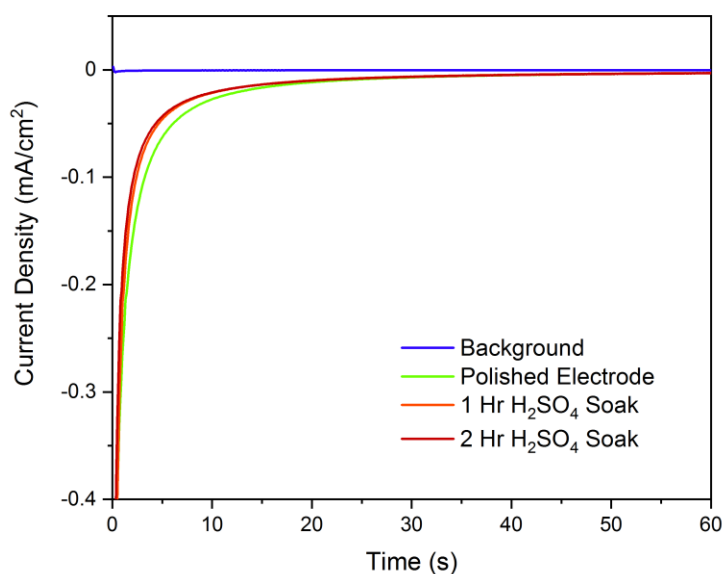

**Figure S20.** Evolution of current density over time measured during chronoamperometry at  $-0.200$  V vs AgCl/Ag of  $7.00$  mM  $K_2CrO_4$  added to a  $0.10$  M succinate buffer at pH  $4.75$ . The electrodes were fouled during the chronoamperometry, then soaked in  $0.50$  M  $H_2SO_4$  at various time intervals and reused for chronoamperometry. Data collected with  $1.00$  M KCl while stirring on a  $5$  mm diameter glassy carbon working electrode. The background trace was collected in the same condition but in the absence of Cr(VI).
